# Supplementary material for: The Homologous Carboxyl-Terminal Domains of Microtubule-Associated Protein 2 and TAU Induce Neuronal Dysfunction and Have Differential Fates in the Evolution of Neurofibrillary Tangles
Source: PubMed Central journal article supplement (PMC3934940; doi:10.1371/journal.pone.0089796), 2014-02-25
Supplement: pone.0089796.s004.pdf [file pone.0089796.s004.pdf]

**Table S1. Information of cases used in this study.**

| Case No. |     | Age/sex | PMI (hours) | Amyloid stage | NFT stage | Tissue          |
|----------|-----|---------|-------------|---------------|-----------|-----------------|
| 8995     | NC1 | 77/M    | 10:05       | Braak 0       | Braak I   | temporal cortex |
| 8806     | NC2 | 78/M    | 11:30       | Braak 0       | Braak I   | temporal cortex |
| 8847     | NC3 | 82/M    | 12:16       | Braak A       | Braak I   | temporal cortex |
| 8473     | AD1 | 81/M    | 6:00        | Braak C       | Braak VI  | temporal cortex |
| 8930     | AD2 | 75/M    | 9:54        | Braak C       | Braak VI  | temporal cortex |
| 8687     | AD3 | 83/M    | 7:02        | Braak C       | Braak VI  | temporal cortex |

Abbreviations: number (No.), male (M), female (F), normal (NC), postmortem interval (PMI).
